# Supplementary material for: Barcoding Life's Matrix: Translating Biodiversity Genomics into High School Settings to Enhance Life Science Education
Source: PLoS Biol. 2013 Jan 29;11(1):e1001471. doi: 10.1371/journal.pbio.1001471 (PMC3558426; doi:10.1371/journal.pbio.1001471)
Supplement: Text S2 — GenBank accession numbers for reference DNA barcode records published by Barcoding Life's Matrix project participants. (PDF) [file pbio.1001471.s002.pdf]

# Supplementary Text S2

| Species                | Sample ID | GenBank Accession Number |
|------------------------|-----------|--------------------------|
| Amphistichus argenteus | NH-72     | JX487273                 |
| Amphistichus argenteus | NH-73     | JX487275                 |
| Amphistichus argenteus | NH-71     | JX487276                 |
| Amphistichus argenteus | NH-74     | JX487274                 |
| Anoplopoma fimbria     | ANFI-08   | JX110779                 |
| Anoplopoma fimbria     | ANFI-05   | JX110777                 |
| Anoplopoma fimbria     | ANFI-07   | JX110793                 |
| Anoplopoma fimbria     | ANFI-09   | JX110780                 |
| Anoplopoma fimbria     | ANFI-06   | JX110778                 |
| Anoplopoma fimbria     | ANFI-04   | JX110776                 |
| Anoplopoma fimbria     | ANFI-10   | JX110781                 |
| Anoplopoma fimbria     | ANFI-02   | JX110791                 |
| Anoplopoma fimbria     | ANFI-03   | JX110792                 |
| Anoplopoma fimbria     | ANFI-01   | JX110790                 |
| Caulolatilus princeps  | VH-14     | JQ672529                 |
| Caulolatilus princeps  | VH-2      | JQ672517                 |
| Caulolatilus princeps  | VH-1      | JQ672516                 |
| Caulolatilus princeps  | VH-15     | JQ672530                 |
| Caulolatilus princeps  | VH-5      | JQ672520                 |
| Caulolatilus princeps  | VH-6      | JQ672521                 |
| Caulolatilus princeps  | VH-10     | JQ672525                 |
| Caulolatilus princeps  | VH-3      | JQ672518                 |
| Caulolatilus princeps  | VH-4      | JQ672519                 |
| Chromis punctipinnis   | CHPU-07   | JQ934972                 |
| Chromis punctipinnis   | VH-35     | JQ694039                 |
| Chromis punctipinnis   | VH-34     | JQ694038                 |
| Chromis punctipinnis   | CHPU-08   | JQ934976                 |
| Chromis punctipinnis   | VH-37     | JQ694041                 |
| Chromis punctipinnis   | VH-38     | PENDING                  |
| Chromis punctipinnis   | CHPU-09   | JQ934975                 |
| Chromis punctipinnis   | CHPU-11   | JQ934966                 |
| Chromis punctipinnis   | CHPU-02   | JQ934973                 |
| Chromis punctipinnis   | CHPU-05   | JQ934974                 |
| Chromis punctipinnis   | CHPU-06   | JQ934971                 |
| Citharichthys sordidus | VH-7      | JQ672522                 |

|                               |         |          |
|-------------------------------|---------|----------|
| <i>Citharichthys sordidus</i> | VH-17   | JQ672532 |
| <i>Citharichthys sordidus</i> | VH-23   | JQ694029 |
| <i>Citharichthys sordidus</i> | NH-44   | JX438502 |
| <i>Citharichthys sordidus</i> | NH-51   | JX438513 |
| <i>Citharichthys sordidus</i> | NH-45   | JX438507 |
| <i>Citharichthys sordidus</i> | NH-59   | JX438521 |
| <i>Citharichthys sordidus</i> | NH-46   | JX438503 |
| <i>Citharichthys sordidus</i> | NH-52   | JX438511 |
| <i>Citharichthys sordidus</i> | NH-60   | JX438525 |
| <i>Citharichthys sordidus</i> | NH-47   | JX438508 |
| <i>Citharichthys sordidus</i> | NH-12   | JX295815 |
| <i>Citharichthys sordidus</i> | NH-13   | JX295822 |
| <i>Citharichthys sordidus</i> | NH-61   | JX438522 |
| <i>Citharichthys sordidus</i> | NH-48   | JX438512 |
| <i>Citharichthys sordidus</i> | NH-11   | JX295817 |
| <i>Citharichthys sordidus</i> | NH-50   | JX438509 |
| <i>Citharichthys sordidus</i> | NH-55   | JX438519 |
| <i>Citharichthys sordidus</i> | NH-56   | JX438515 |
| <i>Citharichthys sordidus</i> | NH-42   | JX438505 |
| <i>Citharichthys sordidus</i> | NH-43   | JX438506 |
| <i>Citharichthys sordidus</i> | NH-22   | JX295825 |
| <i>Citharichthys sordidus</i> | VH-13   | JQ672528 |
| <i>Citharichthys sordidus</i> | VH-19   | JQ672534 |
| <i>Citharichthys sordidus</i> | VH-18   | JQ672533 |
| <i>Citharichthys sordidus</i> | VH-12   | JQ672527 |
| <i>Citharichthys sordidus</i> | VH-16   | JQ672531 |
| <i>Citharichthys sordidus</i> | VH-9    | JQ672524 |
| <i>Citharichthys sordidus</i> | VH-8    | JQ672523 |
| <i>Citharichthys sordidus</i> | VH-11   | JQ672526 |
| <i>Embiotoca jacksoni</i>     | VH-22   | JQ694028 |
| <i>Embiotoca jacksoni</i>     | VH-21   | JQ694027 |
| <i>Embiotoca jacksoni</i>     | EMJA-03 | JN582132 |
| <i>Embiotoca jacksoni</i>     | EMJA-01 | JN582121 |
| <i>Embiotoca jacksoni</i>     | EMJA-04 | JN582131 |
| <i>Embiotoca jacksoni</i>     | EMJA-02 | JN582120 |
| <i>Embiotoca lateralis</i>    | EMLA-07 | JN582111 |
| <i>Embiotoca lateralis</i>    | EMLA-09 | JN582093 |

|                         |            |          |
|-------------------------|------------|----------|
| Embiotoca lateralis     | EMLA-10    | JN582094 |
| Embiotoca lateralis     | EMLA-05    | JN582102 |
| Embiotoca lateralis     | EMLA-06    | JN582103 |
| Embiotoca lateralis     | EMLA-08    | JN582112 |
| Embiotoca lateralis     | EMLA-01    | JN582084 |
| Embiotoca lateralis     | EMLA-02    | JN582085 |
| Embiotoca lateralis     | EMLA-04    | JN582086 |
| Genyonemus lineatus     | VN-1       | JQ934981 |
| Halichoeres semicinctus | HASE-07    | JX124728 |
| Halichoeres semicinctus | HASE-06    | JX124730 |
| Halichoeres semicinctus | HASE-05    | JX124729 |
| Halichoeres semicinctus | HASE-08    | JX124731 |
| Hypsypops rubicundus    | HYRU-01    | JN582165 |
| Hypsypops rubicundus    | HYRU-03    | JN582163 |
| Hypsypops rubicundus    | HYRU-10    | JX487230 |
| Hypsypops rubicundus    | HYRU-02    | JN582164 |
| Hypsypops rubicundus    | HYRU-07    | JN582167 |
| Hypsypops rubicundus    | HYRU-09    | JX487229 |
| Hypsypops rubicundus    | HYRU-04    | JN582170 |
| Hypsypops rubicundus    | HYRU-05    | JN582169 |
| Hypsypops rubicundus    | HYRU-06    | JN582168 |
| Hypsypops rubicundus    | HYRU-08    | JN600313 |
| Lottia gigantea         | OGL-E01620 | JF433977 |
| Lottia gigantea         | KFM-217    | JF433981 |
| Lottia gigantea         | OGL-E01615 | JF433978 |
| Lottia gigantea         | KFM-216    | JF433982 |
| Lottia gigantea         | OGL-E01605 | JF433980 |
| Lottia gigantea         | OGL-E01613 | JF433979 |
| Lottia gigantea         | OGL-E01622 | JF433976 |
| Lottia gigantea         | OGL-E01590 | JF433975 |
| Lottia gigantea         | OGL-E01594 | JF433974 |
| Mola mola               | NH-54      | JX438518 |
| Mustelus henlei         | GE-7       | JX495633 |
| Mustelus henlei         | GE-6       | JX495631 |
| Mustelus henlei         | GE-2       | JX495621 |
| Mustelus henlei         | GE-1a      | JX495616 |
| Mustelus henlei         | GE-4       | JX495628 |

|                       |         |          |
|-----------------------|---------|----------|
| Ophiodon elongatus    | NH-30   | JX295831 |
| Oxyjulis californica  | OXCA-04 | JN582148 |
| Oxyjulis californica  | OXCA-05 | JN582147 |
| Oxyjulis californica  | OXCA-07 | JN582145 |
| Oxyjulis californica  | OXCA-01 | JN582151 |
| Oxyjulis californica  | OXCA-02 | JN582150 |
| Oxyjulis californica  | OXCA-10 | JN582142 |
| Oxyjulis californica  | OXCA-08 | JN582144 |
| Oxyjulis californica  | OXCA-06 | JN582146 |
| Oxyjulis californica  | OXCA-09 | JN582143 |
| Oxyjulis californica  | OXCA-03 | JN582149 |
| Oxylebius pictus      | OXPI-11 | JN582110 |
| Oxylebius pictus      | OXPI-01 | JN582095 |
| Oxylebius pictus      | OXPI-02 | JN582096 |
| Oxylebius pictus      | OXPI-04 | JN582098 |
| Oxylebius pictus      | OXPI-05 | JN582104 |
| Oxylebius pictus      | OXPI-06 | JN582105 |
| Oxylebius pictus      | OXPI-07 | JN582106 |
| Oxylebius pictus      | OXPI-08 | JN582107 |
| Oxylebius pictus      | OXPI-09 | JN582108 |
| Oxylebius pictus      | OXPI-10 | JN582109 |
| Oxylebius pictus      | OXPI-03 | JN582097 |
| Paralabrax clathratus | PACL-07 | JN582134 |
| Paralabrax clathratus | PACL-09 | JN600314 |
| Paralabrax clathratus | PACL-06 | JN600315 |
| Paralabrax clathratus | PACL-08 | JN582133 |
| Patiria miniata       | KFM-426 | HQ231385 |
| Patiria miniata       | KFM-432 | HQ231375 |
| Patiria miniata       | KFM-420 | HQ231383 |
| Patiria miniata       | KFM-419 | HQ231382 |
| Patiria miniata       | KFM-415 | HQ231386 |
| Patiria miniata       | KFM-423 | HQ231388 |
| Patiria miniata       | KFM-416 | HQ231387 |
| Patiria miniata       | KFM-417 | HQ231374 |
| Patiria miniata       | KFM-431 | HQ231373 |
| Patiria miniata       | KFM-429 | HQ231381 |
| Patiria miniata       | KFM-425 | HQ231384 |

|                        |         |          |
|------------------------|---------|----------|
| Patiria miniata        | KFM-422 | HQ231380 |
| Peprilus simillimus    | NH-6    | JX295807 |
| Phanerodon atripes     | LO-37   | JX008537 |
| Rhacochilus vacca      | DAVA-05 | JN582126 |
| Rhacochilus vacca      | DAVA-04 | JN582127 |
| Rhacochilus vacca      | DAVA-03 | JN582128 |
| Rhacochilus vacca      | DAVA-01 | JN582130 |
| Rhacochilus vacca      | DAVA-06 | JN582125 |
| Rhacochilus vacca      | DAVA-02 | JN582129 |
| Rhacochilus vacca      | DAVA-10 | JN582166 |
| Rhacochilus vacca      | DAVA-09 | JN582122 |
| Rhacochilus vacca      | DAVA-08 | JN582123 |
| Rhacochilus vacca      | DAVA-07 | JN582124 |
| Rhinogobiops nicholsii | CONI-07 | JN582118 |
| Rhinogobiops nicholsii | CONI-01 | JN582113 |
| Rhinogobiops nicholsii | CONI-06 | JN582117 |
| Rhinogobiops nicholsii | CONI-10 | JN582087 |
| Rhinogobiops nicholsii | CONI-08 | JN582119 |
| Rhinogobiops nicholsii | CONI-09 | JN582135 |
| Rhinogobiops nicholsii | CONI-02 | JN582114 |
| Rhinogobiops nicholsii | CONI-04 | JN582116 |
| Rhinogobiops nicholsii | CONI-03 | JN582115 |
| Scorpaena guttata      | NH-31   | JX295842 |
| Scorpaena guttata      | NH-15   | JX295819 |
| Sebastes atrovirens    | SE-33   | JN582160 |
| Sebastes atrovirens    | SE-32   | JN582157 |
| Sebastes atrovirens    | SZ-1    | HM107288 |
| Sebastes atrovirens    | AJ-3    | GQ355759 |
| Sebastes atrovirens    | SE-38   | JN571508 |
| Sebastes atrovirens    | SE-35   | JN582161 |
| Sebastes atrovirens    | VH-20   | JQ672535 |
| Sebastes atrovirens    | NH-37   | JX438501 |
| Sebastes atrovirens    | RE-32   | JQ952611 |
| Sebastes atrovirens    | NH-1    | JX295812 |
| Sebastes atrovirens    | RE-2    | JQ672537 |
| Sebastes atrovirens    | RE-5    | JQ672539 |
| Sebastes atrovirens    | VH-31   | JQ694035 |

|                      |         |          |
|----------------------|---------|----------|
| Sebastes atrovirens  | SE-31   | JN582158 |
| Sebastes atrovirens  | SE-34   | JN582159 |
| Sebastes atrovirens  | SEAT-10 | JN600316 |
| Sebastes auriculatus | SE-11   | JN571501 |
| Sebastes auriculatus | GMS-1   | HM107296 |
| Sebastes auriculatus | BHP-2   | HM107303 |
| Sebastes auriculatus | GMS-2   | HM107302 |
| Sebastes auriculatus | SE-29   | JN571517 |
| Sebastes auriculatus | SE-26   | JN571509 |
| Sebastes auriculatus | SE-10   | JN571500 |
| Sebastes auriculatus | SE-12   | JN571499 |
| Sebastes auriculatus | SE-20   | JN582155 |
| Sebastes auriculatus | SE-28   | JN571516 |
| Sebastes auriculatus | SE-27   | JN571515 |
| Sebastes auriculatus | SE-21   | JN571513 |
| Sebastes auriculatus | SE-04   | JN582154 |
| Sebastes auriculatus | SE-06   | JN582153 |
| Sebastes auriculatus | VN-13   | JQ934993 |
| Sebastes auriculatus | VN-19   | JQ934999 |
| Sebastes auriculatus | SE-09   | JN571498 |
| Sebastes auriculatus | SE-08   | JN571497 |
| Sebastes auriculatus | SE-07   | JN571496 |
| Sebastes auriculatus | SE-05   | JN571495 |
| Sebastes auriculatus | SE-03   | JN571494 |
| Sebastes auriculatus | SE-22   | JN571512 |
| Sebastes auriculatus | SE-23   | JN571511 |
| Sebastes auriculatus | SE-02   | JN571493 |
| Sebastes auriculatus | SE-30   | JN571518 |
| Sebastes auriculatus | SE-19   | JN582156 |
| Sebastes auriculatus | SE-24   | JN571510 |
| Sebastes auriculatus | SE-18   | JN571507 |
| Sebastes auriculatus | SE-17   | JN571506 |
| Sebastes auriculatus | SE-15   | JN571504 |
| Sebastes auriculatus | SE-14   | JN571503 |
| Sebastes auriculatus | SE-13   | JN571502 |
| Sebastes carnatus    | LLM-1   | HM107301 |
| Sebastes carnatus    | AM-2    | HM107292 |

|                        |        |          |
|------------------------|--------|----------|
| Sebastes carnatus      | RS-4   | GQ501097 |
| Sebastes carnatus      | NH-3   | JX295808 |
| Sebastes carnatus      | SE-36  | JN582162 |
| Sebastes carnatus      | RS-1   | GQ501098 |
| Sebastes carnatus      | NH-38  | JX438498 |
| Sebastes carnatus      | NH-39  | JX438499 |
| Sebastes carnatus      | BG-8   | GQ501100 |
| Sebastes carnatus      | BG-9   | GQ497753 |
| Sebastes carnatus      | LT-1   | HM107300 |
| Sebastes carnatus      | NH-29  | JX295836 |
| Sebastes carnatus      | RS-6   | GQ501096 |
| Sebastes caurinus      | NH-21  | JX295826 |
| Sebastes caurinus      | NH-66  | JX438528 |
| Sebastes caurinus      | AA-1   | GQ254415 |
| Sebastes caurinus      | NH-14  | JX295824 |
| Sebastes caurinus      | NH-41  | JX438504 |
| Sebastes caurinus      | BG-3   | GQ501104 |
| Sebastes caurinus      | HA-5   | FJ501250 |
| Sebastes caurinus      | NH-53  | JX438514 |
| Sebastes caurinus      | NH-32  | JX295839 |
| Sebastes caurinus      | AC-2   | HM107289 |
| Sebastes caurinus      | NH-4   | JX295809 |
| Sebastes caurinus      | NH-40  | JX438500 |
| Sebastes caurinus      | FT-71  | JX110802 |
| Sebastes chlorostictus | FT-69  | JX487224 |
| Sebastes chlorostictus | FT-60  | JX487221 |
| Sebastes chlorostictus | HH-2   | HQ229647 |
| Sebastes chlorostictus | BLM-1  | HQ229645 |
| Sebastes chlorostictus | HH-1   | HQ229646 |
| Sebastes chlorostictus | BS-11  | GQ396756 |
| Sebastes chlorostictus | FKM-1  | HM107297 |
| Sebastes chlorostictus | BS-12  | GQ396757 |
| Sebastes chlorostictus | SE-50  | JN582073 |
| Sebastes chlorostictus | CMB-10 | HQ231393 |
| Sebastes chlorostictus | FT-26  | JX008504 |
| Sebastes chlorostictus | BS-19  | GQ396763 |
| Sebastes chlorostictus | BS-10  | GQ396755 |

|                        |        |          |
|------------------------|--------|----------|
| Sebastes chlorostictus | SE-60  | JN582078 |
| Sebastes chlorostictus | AHL-2  | HQ229642 |
| Sebastes chlorostictus | CMB-2  | HQ231378 |
| Sebastes chlorostictus | SE-48  | JN582071 |
| Sebastes chlorostictus | SE-47  | JN582070 |
| Sebastes chlorostictus | NH-76  | JX444757 |
| Sebastes chlorostictus | NH-86  | JX444765 |
| Sebastes chlorostictus | NH-87  | JX444764 |
| Sebastes chlorostictus | NH-98  | JX444773 |
| Sebastes chlorostictus | NH-78  | JX444761 |
| Sebastes chlorostictus | NH-99  | JX444775 |
| Sebastes chlorostictus | NH-79  | JX444760 |
| Sebastes chlorostictus | NH-89  | JX444769 |
| Sebastes chlorostictus | NH-100 | JX444771 |
| Sebastes chlorostictus | NH-90  | JX444768 |
| Sebastes chlorostictus | NH-80  | JX444759 |
| Sebastes chlorostictus | NH-101 | JX444778 |
| Sebastes chlorostictus | NH-91  | JX444770 |
| Sebastes chlorostictus | NH-81  | JX444763 |
| Sebastes chlorostictus | NH-93  | JX444767 |
| Sebastes chlorostictus | NH-113 | JX444783 |
| Sebastes chlorostictus | NH-115 | JX444785 |
| Sebastes chlorostictus | NH-106 | JX444780 |
| Sebastes chlorostictus | NH-97  | JX495623 |
| Sebastes chlorostictus | NH-108 | JX495627 |
| Sebastes chlorostictus | NH-85  | JX495618 |
| Sebastes chlorostictus | NH-107 | JX495624 |
| Sebastes chlorostictus | NH-118 | JX495632 |
| Sebastes chlorostictus | FT-68  | JX110801 |
| Sebastes chlorostictus | FT-47  | JX110810 |
| Sebastes chlorostictus | FT-44  | JX110809 |
| Sebastes chlorostictus | FT-48  | JX110811 |
| Sebastes chrysomelas   | CN-2   | FJ501251 |
| Sebastes chrysomelas   | VH-33  | JQ694037 |
| Sebastes chrysomelas   | VH-32  | JQ694036 |
| Sebastes chrysomelas   | RL-4   | GQ355771 |
| Sebastes chrysomelas   | SE-01  | JN571492 |

|                       |           |          |
|-----------------------|-----------|----------|
| Sebastes constellatus | GT-2      | GQ355768 |
| Sebastes constellatus | AB-A-Cox1 | FJ158547 |
| Sebastes constellatus | PS-03     | GQ254302 |
| Sebastes constellatus | PS-01     | GQ254303 |
| Sebastes constellatus | LO-28     | JX008529 |
| Sebastes constellatus | LO-29     | JX487231 |
| Sebastes constellatus | LO-26     | JX008527 |
| Sebastes constellatus | LO-31     | JX008531 |
| Sebastes constellatus | LO-32     | JX008532 |
| Sebastes constellatus | LO-33     | JX008533 |
| Sebastes constellatus | LO-34     | JX008534 |
| Sebastes constellatus | LO-35     | JX008535 |
| Sebastes constellatus | BZ-3      | GQ355765 |
| Sebastes constellatus | BM-2      | GQ355762 |
| Sebastes constellatus | LO-30     | JX008530 |
| Sebastes constellatus | LO-36     | JX008536 |
| Sebastes constellatus | LO-27     | JX008528 |
| Sebastes crocotulus   | FT-41     | JX487269 |
| Sebastes dallii       | RE-37     | JQ952616 |
| Sebastes dallii       | RE-33     | JQ952613 |
| Sebastes dallii       | RE-27     | JQ952608 |
| Sebastes dallii       | RE-30     | JQ952609 |
| Sebastes dallii       | RE-26     | JQ952606 |
| Sebastes dallii       | RE-21     | JQ952602 |
| Sebastes dallii       | RE-1      | JQ672536 |
| Sebastes dallii       | RE-3      | JQ672538 |
| Sebastes dallii       | RE-9      | JQ672542 |
| Sebastes dallii       | RE-10     | JQ672545 |
| Sebastes dallii       | RE-4      | JQ672540 |
| Sebastes dallii       | RE-17     | JQ672552 |
| Sebastes dallii       | RE-18     | JQ672551 |
| Sebastes dallii       | RE-19     | JQ672554 |
| Sebastes dallii       | RE-6      | JQ672541 |
| Sebastes dallii       | RE-20     | JQ672555 |
| Sebastes dallii       | RE-7      | JQ672543 |
| Sebastes dallii       | RE-8      | JQ672544 |
| Sebastes dallii       | SE-41     | JN582067 |

|                    |        |          |
|--------------------|--------|----------|
| Sebastes dallii    | RE-36  | JX124732 |
| Sebastes dallii    | RE-28  | JX124733 |
| Sebastes dallii    | RE-25  | JQ952607 |
| Sebastes dallii    | RE-24  | JQ952605 |
| Sebastes dallii    | RE-23  | JQ952604 |
| Sebastes dallii    | RE-22  | JQ952603 |
| Sebastes dallii    | RE-31  | JQ952612 |
| Sebastes elongatus | BKO-1  | HM107304 |
| Sebastes elongatus | NH-111 | JX495630 |
| Sebastes elongatus | NH-116 | JX444784 |
| Sebastes elongatus | NH-110 | JX444779 |
| Sebastes ensifer   | BS-7   | GQ396752 |
| Sebastes ensifer   | CMB-16 | HQ231389 |
| Sebastes ensifer   | NH-84  | JX444766 |
| Sebastes ensifer   | NH-92  | JX495617 |
| Sebastes ensifer   | CMB-14 | HQ231391 |
| Sebastes ensifer   | CMB-20 | HQ229644 |
| Sebastes ensifer   | PS-05  | GQ254304 |
| Sebastes ensifer   | PS-02  | GQ254305 |
| Sebastes ensifer   | BS-9   | GQ396758 |
| Sebastes goodei    | FT-29  | JX008507 |
| Sebastes goodei    | FT-27  | JX008505 |
| Sebastes goodei    | FT-19  | JX487265 |
| Sebastes goodei    | FT-31  | JX008509 |
| Sebastes goodei    | FT-20  | JX487263 |
| Sebastes goodei    | FT-10  | JX487261 |
| Sebastes goodei    | FT-39  | JX008515 |
| Sebastes goodei    | FT-9   | JX487257 |
| Sebastes goodei    | FT-33  | JX008511 |
| Sebastes goodei    | FT-40  | JX008516 |
| Sebastes goodei    | NH-49  | JX438510 |
| Sebastes goodei    | FT-15  | JX487260 |
| Sebastes goodei    | FT-14  | JX008500 |
| Sebastes goodei    | FT-17  | JX487262 |
| Sebastes goodei    | FT-18  | JX008502 |
| Sebastes goodei    | FT-4   | JX008517 |
| Sebastes goodei    | FT-8   | JX008521 |

|                   |           |          |
|-------------------|-----------|----------|
| Sebastes goodei   | FT-16     | JX008501 |
| Sebastes goodei   | FT-6      | JX008519 |
| Sebastes goodei   | FT-25     | JX487267 |
| Sebastes goodei   | FT-7      | JX008520 |
| Sebastes goodei   | FT-23     | JX487264 |
| Sebastes goodei   | NH-112    | JX444776 |
| Sebastes goodei   | NH-94     | JX444774 |
| Sebastes goodei   | NH-95     | JX444772 |
| Sebastes goodei   | NH-69     | JX438531 |
| Sebastes goodei   | NH-117    | JX444781 |
| Sebastes goodei   | BS-1      | GQ396748 |
| Sebastes goodei   | NH-58     | JX438517 |
| Sebastes goodei   | NH-103    | JX495625 |
| Sebastes goodei   | CJ-3      | HM622589 |
| Sebastes goodei   | SE-55     | JN582076 |
| Sebastes goodei   | BS-2      | GQ396749 |
| Sebastes goodei   | PS-04     | GQ254306 |
| Sebastes goodei   | NH-82     | JX495619 |
| Sebastes goodei   | FT-77     | JX110804 |
| Sebastes goodei   | NH-109    | JX495629 |
| Sebastes goodei   | NH-102    | JX495622 |
| Sebastes goodei   | FT-30     | JX008508 |
| Sebastes goodei   | FT-21     | JX008503 |
| Sebastes goodei   | FT-37     | JX008513 |
| Sebastes goodei   | FT-22     | JX008539 |
| Sebastes goodei   | FT-34     | JX487268 |
| Sebastes hopkinsi | LO-40     | JX487233 |
| Sebastes hopkinsi | GHL-1     | HM107298 |
| Sebastes hopkinsi | RL-2      | GQ355773 |
| Sebastes hopkinsi | AR-2      | GQ260056 |
| Sebastes hopkinsi | AR-1      | GQ260057 |
| Sebastes hopkinsi | NH-114    | JX444782 |
| Sebastes hopkinsi | BZ-2      | GQ355766 |
| Sebastes hopkinsi | CMB-9     | HQ231394 |
| Sebastes hopkinsi | AB-D-Cox1 | FJ158548 |
| Sebastes hopkinsi | CMB-1     | HQ231379 |
| Sebastes hopkinsi | GM-4      | GQ254406 |

|                       |       |          |
|-----------------------|-------|----------|
| Sebastes hopkinsi     | PS-08 | GQ254307 |
| Sebastes hopkinsi     | IS-4  | GQ254402 |
| Sebastes hopkinsi     | RL-3  | GQ355772 |
| Sebastes hopkinsi     | BM-3  | GQ355763 |
| Sebastes hopkinsi     | NH-65 | JX438530 |
| Sebastes hopkinsi     | NH-67 | JX438527 |
| Sebastes melanostomus | SV-19 | JX487215 |
| Sebastes melanostomus | SV-15 | JX487212 |
| Sebastes melanostomus | SV-23 | JX487244 |
| Sebastes melanostomus | SV-24 | JX487248 |
| Sebastes melanostomus | SV-25 | JX487247 |
| Sebastes melanostomus | SV-26 | JX487246 |
| Sebastes melanostomus | SV-27 | JX487251 |
| Sebastes melanostomus | SV-22 | JX487243 |
| Sebastes melanostomus | SV-18 | JX487238 |
| Sebastes melanostomus | SV-21 | JX487241 |
| Sebastes melanostomus | SV-17 | JX487214 |
| Sebastes melanostomus | SV-16 | JX487213 |
| Sebastes melanostomus | SV-20 | JX487216 |
| Sebastes miniatus     | RE-12 | JQ672547 |
| Sebastes miniatus     | RE-13 | JQ672548 |
| Sebastes miniatus     | SE-56 | JN582080 |
| Sebastes miniatus     | SE-54 | JN582079 |
| Sebastes miniatus     | CN-6  | FJ501252 |
| Sebastes miniatus     | SE-53 | JN582077 |
| Sebastes miniatus     | FT-52 | JX110814 |
| Sebastes miniatus     | FT-55 | JX487217 |
| Sebastes miniatus     | FT-12 | JX008499 |
| Sebastes miniatus     | RE-39 | JX124734 |
| Sebastes miniatus     | FT-43 | JX110808 |
| Sebastes miniatus     | SE-25 | JN571514 |
| Sebastes miniatus     | LO-38 | JX008538 |
| Sebastes miniatus     | BS-5  | GQ396753 |
| Sebastes miniatus     | FT-79 | JX110806 |
| Sebastes miniatus     | GM-1  | GQ254407 |
| Sebastes miniatus     | BZ-1  | GQ355767 |
| Sebastes miniatus     | FT-36 | JX487266 |

|                   |         |          |
|-------------------|---------|----------|
| Sebastes miniatus | RE-16   | JQ672553 |
| Sebastes miniatus | RE-38   | JQ952617 |
| Sebastes miniatus | FT-49   | JX487270 |
| Sebastes miniatus | RE-40   | JQ952618 |
| Sebastes miniatus | RE-35   | JQ952615 |
| Sebastes miniatus | SE-44   | JN582136 |
| Sebastes miniatus | RE-34   | JQ952614 |
| Sebastes miniatus | RE-15   | JQ672549 |
| Sebastes miniatus | RE-29   | JQ952610 |
| Sebastes miniatus | FT-63   | JX110788 |
| Sebastes miniatus | SE-16   | JN571505 |
| Sebastes miniatus | RE-14   | JQ672550 |
| Sebastes miniatus | IS-1    | GQ254403 |
| Sebastes miniatus | SE-52   | JN582075 |
| Sebastes miniatus | SE-43   | JN582069 |
| Sebastes miniatus | FT-51   | JX110813 |
| Sebastes miniatus | SE-42   | JN582068 |
| Sebastes miniatus | LO-39   | JX487234 |
| Sebastes mystinus | 1-BC    | GQ254413 |
| Sebastes mystinus | SEMY-02 | JN582089 |
| Sebastes mystinus | 2-BC    | GQ254412 |
| Sebastes mystinus | RA-2    | HM622582 |
| Sebastes mystinus | AR-3    | GQ260058 |
| Sebastes mystinus | AA-2    | GQ254417 |
| Sebastes mystinus | AA-3    | GQ254416 |
| Sebastes mystinus | SEMY-10 | JN582101 |
| Sebastes mystinus | VH-29   | JQ694042 |
| Sebastes mystinus | SEMY-01 | JN582088 |
| Sebastes mystinus | VH-26   | JQ694032 |
| Sebastes mystinus | SEMY-06 | JN582137 |
| Sebastes mystinus | SEMY-03 | JN582090 |
| Sebastes mystinus | SEMY-04 | JN582091 |
| Sebastes mystinus | SEMY-07 | JN582092 |
| Sebastes mystinus | SEMY-05 | JN582138 |
| Sebastes mystinus | VH-30   | JQ694034 |
| Sebastes mystinus | SEMY-08 | JN582099 |
| Sebastes mystinus | VH-28   | JQ694033 |

|                      |         |          |
|----------------------|---------|----------|
| Sebastes mystinus    | VH-25   | JQ694031 |
| Sebastes mystinus    | SEMY-09 | JN582100 |
| Sebastes mystinus    | GM-2    | GQ254408 |
| Sebastes ovalis      | BM-1    | GQ355764 |
| Sebastes ovalis      | BS-17   | GQ396764 |
| Sebastes ovalis      | AR-4    | GQ260059 |
| Sebastes ovalis      | LO-23   | JX008524 |
| Sebastes ovalis      | LO-25   | JX008526 |
| Sebastes ovalis      | LO-21   | JX008522 |
| Sebastes ovalis      | LO-22   | JX008523 |
| Sebastes ovalis      | LO-24   | JX008525 |
| Sebastes ovalis      | BS-14   | GQ396760 |
| Sebastes ovalis      | BS-13   | GQ396759 |
| Sebastes ovalis      | BS-6    | GQ396754 |
| Sebastes ovalis      | AA-4    | GQ254418 |
| Sebastes ovalis      | LO-7    | JX050975 |
| Sebastes ovalis      | LO-9    | JX050977 |
| Sebastes ovalis      | LO-4    | JX050972 |
| Sebastes ovalis      | LO-6    | JX050974 |
| Sebastes ovalis      | LO-5    | JX050973 |
| Sebastes ovalis      | LO-8    | JX050976 |
| Sebastes ovalis      | CMB-6   | HQ231376 |
| Sebastes paucispinis | FT-72   | JX110803 |
| Sebastes paucispinis | FT-1    | JX487259 |
| Sebastes paucispinis | FT-42   | JX487272 |
| Sebastes paucispinis | FT-45   | JX487271 |
| Sebastes paucispinis | NH-104  | JX495626 |
| Sebastes paucispinis | NH-105  | JX444777 |
| Sebastes paucispinis | NH-77   | JX444758 |
| Sebastes paucispinis | FT-11   | JX008498 |
| Sebastes paucispinis | FT-5    | JX008518 |
| Sebastes paucispinis | FT-38   | JX008514 |
| Sebastes paucispinis | FT-28   | JX008506 |
| Sebastes paucispinis | FT-35   | JX008512 |
| Sebastes paucispinis | FT-32   | JX008510 |
| Sebastes paucispinis | LO-1    | JX050969 |
| Sebastes paucispinis | LO-3    | JX050971 |

|                       |       |          |
|-----------------------|-------|----------|
| Sebastes paucispinis  | LO-2  | JX050970 |
| Sebastes paucispinis  | FT-65 | JX110799 |
| Sebastes paucispinis  | FT-80 | JX110807 |
| Sebastes paucispinis  | FT-62 | JX110787 |
| Sebastes paucispinis  | FT-78 | JX110805 |
| Sebastes paucispinis  | FT-61 | JX110797 |
| Sebastes paucispinis  | FT-50 | JX110812 |
| Sebastes paucispinis  | FT-74 | JX487225 |
| Sebastes paucispinis  | SE-46 | JN582139 |
| Sebastes paucispinis  | GM-3  | GQ254409 |
| Sebastes paucispinis  | IS-3  | GQ254404 |
| Sebastes paucispinis  | IS-2  | GQ254405 |
| Sebastes paucispinis  | SE-49 | JN582072 |
| Sebastes paucispinis  | SE-58 | JN582083 |
| Sebastes paucispinis  | SE-59 | JN582082 |
| Sebastes paucispinis  | SE-57 | JN582081 |
| Sebastes paucispinis  | GT-1  | GQ355769 |
| Sebastes paucispinis  | SE-51 | JN582074 |
| Sebastes paucispinis  | FT-75 | JX487228 |
| Sebastes paucispinis  | FT-58 | JX487222 |
| Sebastes paucispinis  | FT-57 | JX487219 |
| Sebastes paucispinis  | NH-33 | JX295840 |
| Sebastes paucispinis  | NH-34 | JX295838 |
| Sebastes paucispinis  | NH-35 | JX295841 |
| Sebastes phillipsi    | SV-28 | JX487252 |
| Sebastes phillipsi    | SV-2  | JX487240 |
| Sebastes phillipsi    | SV-4  | JX487237 |
| Sebastes phillipsi    | SV-8  | JX487205 |
| Sebastes phillipsi    | SV-6  | JX487203 |
| Sebastes phillipsi    | SV-5  | JX487202 |
| Sebastes phillipsi    | SV-3  | JX487201 |
| Sebastes phillipsi    | SV-10 | JX487207 |
| Sebastes phillipsi    | SV-9  | JX487206 |
| Sebastes phillipsi    | SV-30 | JX487255 |
| Sebastes phillipsi    | SV-29 | JX487249 |
| Sebastes phillipsi    | SV-7  | JX487204 |
| Sebastes rastrelliger | VN-4  | JQ934984 |

|                       |           |          |
|-----------------------|-----------|----------|
| Sebastes rastrelliger | VN-3      | JQ934983 |
| Sebastes rastrelliger | VN-2      | JQ934982 |
| Sebastes rastrelliger | VN-17     | JQ934997 |
| Sebastes rastrelliger | VN-18     | JQ934998 |
| Sebastes rastrelliger | VN-12     | JQ934992 |
| Sebastes rastrelliger | VN-11     | JQ934991 |
| Sebastes rastrelliger | VN-10     | JQ934990 |
| Sebastes rastrelliger | VN-9      | JQ934989 |
| Sebastes rastrelliger | VN-8      | JQ934988 |
| Sebastes rastrelliger | VN-7      | JQ934987 |
| Sebastes rastrelliger | VN-6      | JQ934986 |
| Sebastes rastrelliger | VN-20     | JX487227 |
| Sebastes rastrelliger | VN-16     | JQ934996 |
| Sebastes rastrelliger | VN-15     | JQ934995 |
| Sebastes rastrelliger | VN-14     | JQ934994 |
| Sebastes rastrelliger | VN-5      | JQ934985 |
| Sebastes rosaceus     | NH-18     | JX295820 |
| Sebastes rosaceus     | BG-10     | GQ497754 |
| Sebastes rosaceus     | BG-1      | GQ501107 |
| Sebastes rosaceus     | BG-4      | GQ501105 |
| Sebastes rosaceus     | CB-1      | HM622587 |
| Sebastes rosaceus     | PS-09     | GQ254308 |
| Sebastes rosaceus     | PS-06     | GQ254309 |
| Sebastes rosaceus     | AAE-1     | HQ229648 |
| Sebastes rosaceus     | PV-1      | HM107293 |
| Sebastes rosaceus     | BS-4      | GQ396750 |
| Sebastes rosaceus     | AB-B-Cox1 | FJ158549 |
| Sebastes rosaceus     | BG-2      | GQ501106 |
| Sebastes rosaceus     | RA-1      | HM622583 |
| Sebastes rosaceus     | RL-1      | GQ355774 |
| Sebastes rosaceus     | NH-19     | JX295828 |
| Sebastes rosaceus     | NH-7      | JX295816 |
| Sebastes rosaceus     | NH-24     | JX295830 |
| Sebastes rosaceus     | NH-8      | JX295814 |
| Sebastes rosaceus     | NH-9      | JX295818 |
| Sebastes rosaceus     | NH-10     | JX295813 |
| Sebastes rosaceus     | NH-27     | JX295832 |

|                       |        |          |
|-----------------------|--------|----------|
| Sebastes rosaceus     | NH-25  | JX295833 |
| Sebastes rosaceus     | CO-2   | JX487242 |
| Sebastes rosaceus     | NH-28  | JX295834 |
| Sebastes rosaceus     | CO-3   | JX487245 |
| Sebastes rosaceus     | CO-4   | JX487250 |
| Sebastes rosaceus     | CO-5   | JX487253 |
| Sebastes rosaceus     | CO-6   | JX487254 |
| Sebastes rosaceus     | CO-7   | JX487256 |
| Sebastes rosaceus     | NH-20  | JX295829 |
| Sebastes rosaceus     | NH-23  | JX295827 |
| Sebastes rosaceus     | RE-11  | JQ672546 |
| Sebastes rosaceus     | NH-17  | JX295821 |
| Sebastes rosaceus     | NH-26  | JX295835 |
| Sebastes rosaceus     | NH-36  | JX295837 |
| Sebastes rosaceus     | FT-3   | JX487258 |
| Sebastes rosaceus     | CO-1   | JX487239 |
| Sebastes rubrivinctus | LO-13  | JX050981 |
| Sebastes rubrivinctus | CMB-4  | HQ231377 |
| Sebastes rubrivinctus | LO-16  | JX050984 |
| Sebastes rubrivinctus | LO-17  | JX050985 |
| Sebastes rubrivinctus | LO-10  | JX050978 |
| Sebastes rubrivinctus | FT-59  | JX110815 |
| Sebastes rubrivinctus | LO-18  | JX050986 |
| Sebastes rubrivinctus | LO-20  | JX487232 |
| Sebastes rubrivinctus | LO-12  | JX050980 |
| Sebastes rubrivinctus | BS-16  | GQ396762 |
| Sebastes rubrivinctus | BS-20  | GQ396766 |
| Sebastes rubrivinctus | FKM-2  | HM107299 |
| Sebastes rubrivinctus | GSV-1  | HM107305 |
| Sebastes rubrivinctus | CMB-19 | HQ229643 |
| Sebastes rubrivinctus | PS-07  | GQ254310 |
| Sebastes rubrivinctus | LO-15  | JX050983 |
| Sebastes rubrivinctus | LO-14  | JX050982 |
| Sebastes rubrivinctus | BS-18  | GQ396765 |
| Sebastes rubrivinctus | LO-19  | JX050987 |
| Sebastes rubrivinctus | LO-11  | JX050979 |
| Sebastes rubrivinctus | BS-15  | GQ396761 |

|                      |           |          |
|----------------------|-----------|----------|
| Sebastes rufus       | SV-11     | JX487208 |
| Sebastes rufus       | SV-12     | JX487209 |
| Sebastes rufus       | 4-BC      | GQ254414 |
| Sebastes rufus       | SV-13     | JX487210 |
| Sebastes rufus       | SV-14     | JX487211 |
| Sebastes semicinctus | GT-3      | GQ355770 |
| Sebastes semicinctus | NH-83     | JX444762 |
| Sebastes semicinctus | AC-1      | HM107290 |
| Sebastes semicinctus | FT-64     | JX110798 |
| Sebastes semicinctus | FT-67     | JX110800 |
| Sebastes semicinctus | FT-66     | JX110789 |
| Sebastes semicinctus | NH-96     | JX495620 |
| Sebastes semicinctus | AB-C-Cox1 | FJ158550 |
| Sebastes semicinctus | FT-70     | JX487223 |
| Sebastes semicinctus | FT-73     | JX487226 |
| Sebastes semicinctus | NH-70     | JX438529 |
| Sebastes semicinctus | AJ-2      | GQ355760 |
| Sebastes semicinctus | FT-54     | JX487218 |
| Sebastes semicinctus | CMB-11    | HQ231392 |
| Sebastes semicinctus | FT-56     | JX487220 |
| Sebastes semicinctus | CMB-8     | HQ231395 |
| Sebastes semicinctus | CMB-15    | HQ231390 |
| Sebastes semicinctus | CB-2      | HM622588 |
| Sebastes semicinctus | BD-1      | HM622585 |
| Sebastes semicinctus | NH-64     | JX438520 |
| Sebastes semicinctus | NH-57     | JX438516 |
| Sebastes semicinctus | NH-63     | JX438523 |
| Sebastes semicinctus | NH-62     | JX438524 |
| Sebastes semicinctus | NH-68     | JX438526 |
| Sebastes serranoides | AJ-4      | GQ355761 |
| Sebastes serranoides | SESE-08   | JN600319 |
| Sebastes serranoides | SESE-09   | JN600318 |
| Sebastes serranoides | SESE-10   | JN600317 |
| Sebastes serranoides | SESE-03   | JN582174 |
| Sebastes serranoides | SESE-04   | JN582173 |
| Sebastes serranoides | SESE-05   | JN582152 |
| Sebastes serranoides | SESE-06   | JN582172 |

|                        |           |          |
|------------------------|-----------|----------|
| Sebastes serranoides   | VH-24     | JQ694030 |
| Sebastes serranoides   | VH-36     | JQ694040 |
| Sebastes serranoides   | NH-2      | JX295811 |
| Sebastes serranoides   | SESE-07   | JN582171 |
| Sebastes serranoides   | SESE-01   | JN582141 |
| Sebastes serranoides   | SESE-02   | JN582140 |
| Sebastes serriceps     | HA-7      | FJ501254 |
| Sebastes serriceps     | CN-5      | FJ501253 |
| Sebastes serriceps     | HA-6      | FJ501255 |
| Sebastes serriceps     | AAE-2     | HQ229649 |
| Sebastes serriceps     | HA-4      | FJ501256 |
| Sebastes serriceps     | HA-3      | FJ501257 |
| Sebastes serriceps     | AM-1      | HM107294 |
| Sebastes serriceps     | AF-1      | HM107295 |
| Sebastes serriceps     | BG-7      | GQ501101 |
| Sebastes serriceps     | DD-8      | GQ254297 |
| Sebastes umbrosus      | BG-6      | GQ501102 |
| Sebastes umbrosus      | BG-5      | GQ501103 |
| Sebastes umbrosus      | RS-3      | GQ501099 |
| Sebastes umbrosus      | SZ-2      | HM107291 |
| Sebastes umbrosus      | CB-5      | HM622584 |
| Sebastes umbrosus      | BD-2      | HM622586 |
| Sebastes umbrosus      | AB-E-Cox1 | FJ158551 |
| Sebastes umbrosus      | NH-5      | JX295810 |
| Sebastes umbrosus      | NH-16     | JX295823 |
| Sebastes umbrosus      | BS-3      | GQ396751 |
| Sebastolobus altivelis | SEAL-8    | JX110786 |
| Sebastolobus altivelis | SEAL-1    | JX110782 |
| Sebastolobus altivelis | SEAL-2    | JX110794 |
| Sebastolobus altivelis | SEAL-6    | JX110785 |
| Sebastolobus altivelis | SEAL-5    | JX110795 |
| Sebastolobus altivelis | SEAL-9    | JX487235 |
| Sebastolobus altivelis | SEAL-3    | JX110783 |
| Sebastolobus altivelis | SEAL-4    | JX110784 |
| Sebastolobus altivelis | SEAL-7    | JX110796 |
| Sebastolobus altivelis | SEAL-10   | JX487236 |
| Semicossyphus pulcher  | SEPU-03   | JQ934980 |

|                        |         |          |
|------------------------|---------|----------|
| Semicossyphus pulcher  | SEPU-02 | JQ934978 |
| Semicossyphus pulcher  | SEPU-07 | JQ934967 |
| Semicossyphus pulcher  | SEPU-09 | JQ934970 |
| Semicossyphus pulcher  | SEPU-04 | JQ934979 |
| Semicossyphus pulcher  | SEPU-01 | JQ934977 |
| Semicossyphus pulcher  | SEPU-08 | JQ934968 |
| Semicossyphus pulcher  | SEPU-10 | JQ934969 |
| Stylaster californicus | SC-9    | HQ603190 |
| Stylaster californicus | SC-13   | HQ603194 |
| Stylaster californicus | SC-14   | HQ603195 |
| Stylaster californicus | SC-16   | HQ603196 |
| Stylaster californicus | SC-17   | HQ603197 |
| Stylaster californicus | SC-11   | HQ603192 |
| Stylaster californicus | SC-12   | HQ603193 |
| Stylaster californicus | SC-10   | HQ603191 |
